# Supplementary material for: Structure and molecular packing in smectic BCr and Ad phases of Schiff base liquid crystal compounds through the analyses of layer spacing, entropy and crystal structure
Source: Royal Society of Chemistry journal article supplement (doi:10.1039/c7cp03863a), 2017-01-01
Supplement: c7cp03863a1.pdf [file c7cp03863a1.pdf]

## Supplementary information for

# Structure and molecular packing in smectic B<sub>Cr</sub> and A<sub>d</sub> phases of Schiff base liquid crystal compounds through the analyses of layer spacing, entropy and crystal structure

Yasuhisa Yamamura,<sup>a</sup> Takahito Murakoshi,<sup>a</sup> Sakiko Iwagaki,<sup>a</sup> Natalia Osiecka,<sup>b</sup>  
Hideki Saitoh,<sup>c</sup> Mafumi Hishida,<sup>a</sup> Zbigniew Galewski,<sup>d</sup> Maria Massalska-Arodz,<sup>b</sup> and  
Kazuya Saito<sup>a</sup>

<sup>a</sup>*Department of Chemistry, Faculty of Pure and Applied Sciences, University of Tsukuba, Tsukuba, Ibaraki 305-8571, Japan*

<sup>b</sup>*The Henryk Niewodniczanski Institute of Nuclear Physics, Polish Academy of Sciences, Kraków 31-342, Poland*

<sup>c</sup>*Department of Chemistry, Graduate School of Science and Engineering, Saitama University, Saitama 338-8570, Japan*

<sup>d</sup>*The Faculty of Chemistry, University of Wrocław, Wrocław 50-383, Poland*

Table S1. Experimental Conditions and Crystallographic Parameters.

|                                                                 |                                                               |
|-----------------------------------------------------------------|---------------------------------------------------------------|
|                                                                 | 5CBAA                                                         |
| Chemical formula                                                | C <sub>18</sub> H <sub>20</sub> ClNO                          |
| Formula Weight                                                  | 301.81                                                        |
| Crystal size (mm)                                               | 0.34×0.30×0.02                                                |
| <i>T</i> / K                                                    | 295(2)                                                        |
| Wavelength / Å                                                  | 0.71073                                                       |
| Crystal system                                                  | Orthorhombic                                                  |
| Space group                                                     | <i>Pca</i> 2 <sub>1</sub>                                     |
| <i>a</i> / Å                                                    | 6.1002(3)                                                     |
| <i>b</i> / Å                                                    | 7.3335(4)                                                     |
| <i>c</i> / Å                                                    | 36.4538(18)                                                   |
| <i>V</i> / Å <sup>3</sup>                                       | 1630.79(14)                                                   |
| <i>Z</i>                                                        | 4                                                             |
| <i>F</i> (000)                                                  | 640                                                           |
| <i>D</i> <sub>x</sub> / Mg·m <sup>-3</sup>                      | 1.229                                                         |
| <i>μ</i> / mm <sup>-1</sup>                                     | 0.233                                                         |
| Absorption correction                                           | Numerical ( <i>SADABS</i> )                                   |
| <i>T</i> <sub>max</sub> and <i>T</i> <sub>min</sub>             | 1.00, 0.91                                                    |
| <i>θ</i> <sub>max</sub> / °                                     | 27.47                                                         |
| Index ranges                                                    | -7 ≤ <i>h</i> ≤ 6<br>-9 ≤ <i>k</i> ≤ 9<br>-41 ≤ <i>l</i> ≤ 47 |
| No. of reflections collected                                    | 10115                                                         |
| No. of independent reflections                                  | 3309 [ <i>R</i> (int)=0.0192]                                 |
| Completeness                                                    | 99.9% [ <i>θ</i> ≤ 27.47°]                                    |
| No. of reflections [ <i>I</i> > 2σ( <i>I</i> )]                 | 2553                                                          |
| Refinement method                                               | Full-matrix least-squares on <i>F</i> <sup>2</sup>            |
| H-atom parameters                                               | Refined all                                                   |
| No. of data used in refinement                                  | 3309                                                          |
| No. of parameters                                               | 259                                                           |
| No. of restraints                                               | 1                                                             |
| <i>R</i> [ <i>F</i> <sup>2</sup> > 2σ( <i>F</i> <sup>2</sup> )] | 0.0389                                                        |
| <i>c</i> <sub>1</sub> and <i>c</i> <sub>2</sub> (*)             | 0.0584, 0.0894                                                |
| <i>wR</i> ( <i>F</i> <sup>2</sup> )                             | 0.1128                                                        |
| <i>S</i>                                                        | 1.083                                                         |
| Absolute structure parameter (**)                               | -0.04(5)                                                      |
| (Δ/σ) <sub>max</sub>                                            | < 0.001                                                       |
| Δρ <sub>max</sub> and Δρ <sub>min</sub> (e Å <sup>-3</sup> )    | 0.112, -0.144                                                 |

(\*)  $w = 1 / [\sigma^2(F_o^2) + (c_1 \cdot P)^2 + c_2 \cdot P]$  where  $P = (F_o^2 + 2F_c^2) / 3$

(\*\*) Flack *x* determined using 914 quotients [(I+)-(I-)]/[(I+)+(I-)] (Parsons et al., 2013)

Table S2. Experimental Conditions and Crystallographic Parameters.

| Chemical formula<br>Formula Weight                              | 5ABCA                                                             |                                                                 |
|-----------------------------------------------------------------|-------------------------------------------------------------------|-----------------------------------------------------------------|
|                                                                 | C <sub>18</sub> H <sub>20</sub> ClNO<br>301.81                    |                                                                 |
|                                                                 | RT phase                                                          | LT phase                                                        |
| Crystal size (mm)                                               | 0.32×0.18×0.04                                                    | 0.40×0.26×0.04                                                  |
| <i>T</i> / K                                                    | 295(2)                                                            | 106(1)                                                          |
| Wavelength / Å                                                  | 0.71073                                                           | 1.5412                                                          |
| Crystal system                                                  | Monoclinic                                                        | Triclinic                                                       |
| Space group                                                     | <i>P</i> 2 <sub>1</sub> / <i>c</i>                                | <i>P</i> 1-                                                     |
| <i>a</i> / Å                                                    | 19.3197(6)                                                        | 18.4072(7)                                                      |
| <i>b</i> / Å                                                    | 8.6990(2)                                                         | 8.61246(16)                                                     |
| <i>c</i> / Å                                                    | 9.8963(3)                                                         | 9.9664(2)                                                       |
| $\alpha$ / °                                                    |                                                                   | 93.7782(16)                                                     |
| $\beta$ / °                                                     | 92.2801(15)                                                       | 90.5052(14)                                                     |
| $\gamma$ / °                                                    |                                                                   | 95.6436(10)                                                     |
| <i>V</i> / Å <sup>3</sup>                                       | 1661.88(8)                                                        | 1568.73(7)                                                      |
| <i>Z</i>                                                        | 4                                                                 | 4                                                               |
| <i>F</i> (000)                                                  | 640                                                               | 640                                                             |
| <i>D</i> <sub>x</sub> / Mg·m <sup>-3</sup>                      | 1.206                                                             | 1.278                                                           |
| $\mu$ / mm <sup>-1</sup>                                        | 0.229                                                             | 0.213                                                           |
| Absorption correction                                           | Numerical ( <i>SADABS</i> )                                       | Not performed                                                   |
| <i>T</i> <sub>max</sub> and <i>T</i> <sub>min</sub>             | 0.99, 0.95                                                        |                                                                 |
| $\theta$ <sub>max</sub> / °                                     | 25.37                                                             | 68.21                                                           |
| Index ranges                                                    | -23 ≤ <i>h</i> ≤ 23<br>-10 ≤ <i>k</i> ≤ 10<br>-11 ≤ <i>l</i> ≤ 11 | -22 ≤ <i>h</i> ≤ 22<br>-10 ≤ <i>k</i> ≤ 10<br>-5 ≤ <i>l</i> ≤ 5 |
| No. of reflections collected                                    | 40074                                                             | 6530                                                            |
| No. of independent reflections                                  | 3045 [ <i>R</i> (int)=0.0234]                                     | 2907 [ <i>R</i> (int)=0.0314]                                   |
| Completeness                                                    | 99.9% [ $\theta$ ≤ 25.37°]                                        | 50.5% [ $\theta$ ≤ 68.21°]                                      |
| No. of reflections [ <i>I</i> > 2σ( <i>I</i> )]                 | 2155                                                              | 5573                                                            |
| Refinement method                                               | Full-matrix least-squares on <i>F</i> <sup>2</sup>                |                                                                 |
| H-atom parameters                                               | Mixed                                                             | Refined 2-component twin<br>Constrained                         |
| No. of data used in refinement                                  | 3045                                                              | 6530                                                            |
| No. of parameters                                               | 252                                                               | 382                                                             |
| No. of restraints                                               | 3                                                                 | 0                                                               |
| <i>R</i> [ <i>F</i> <sup>2</sup> > 2σ( <i>F</i> <sup>2</sup> )] | 0.0406                                                            | 0.0786                                                          |
| <i>c</i> <sub>1</sub> and <i>c</i> <sub>2</sub> (*)             | 0.0460, 0.3384                                                    | 0.1133, 4.7614                                                  |
| <i>wR</i> ( <i>F</i> <sup>2</sup> )                             | 0.1154                                                            | 0.2983                                                          |
| <i>S</i>                                                        | 1.059                                                             | 1.246                                                           |
| (Δ/σ) <sub>max</sub>                                            | < 0.001                                                           | < 0.001                                                         |
| Δρ <sub>max</sub> and Δρ <sub>min</sub> (e Å <sup>-3</sup> )    | 0.158, -0.209                                                     | 0.378, -0.432                                                   |

(\*)  $w = 1 / [\sigma^2(F_o^2) + (c_1 \cdot P)^2 + c_2 \cdot P]$  where  $P = (F_o^2 + 2F_c^2) / 3$

Table S3. Standard thermodynamic quantities of 5CBAA.

| $T$<br>K    | $C_p$<br>J K <sup>-1</sup> mol <sup>-1</sup> | $[H^\circ(T) - H^\circ(0)] / T$<br>J K <sup>-1</sup> mol <sup>-1</sup> | $S^\circ(T) - S^\circ(0)$<br>J K <sup>-1</sup> mol <sup>-1</sup> | $-[G^\circ(T) - H^\circ(0)] / T$<br>J K <sup>-1</sup> mol <sup>-1</sup> |
|-------------|----------------------------------------------|------------------------------------------------------------------------|------------------------------------------------------------------|-------------------------------------------------------------------------|
| Crystal (K) |                                              |                                                                        |                                                                  |                                                                         |
| 10          | 6.65                                         | 1.76                                                                   | 2.36                                                             | 0.597                                                                   |
| 20          | 25.63                                        | 8.72                                                                   | 12.47                                                            | 3.75                                                                    |
| 30          | 47.51                                        | 18.00                                                                  | 26.99                                                            | 9.00                                                                    |
| 40          | 67.89                                        | 27.97                                                                  | 43.50                                                            | 15.54                                                                   |
| 50          | 86.24                                        | 37.82                                                                  | 60.66                                                            | 22.84                                                                   |
| 60          | 102.79                                       | 47.29                                                                  | 77.87                                                            | 30.58                                                                   |
| 70          | 117.78                                       | 56.31                                                                  | 94.86                                                            | 38.55                                                                   |
| 80          | 131.43                                       | 64.86                                                                  | 111.49                                                           | 46.63                                                                   |
| 90          | 143.99                                       | 72.96                                                                  | 127.71                                                           | 54.75                                                                   |
| 100         | 155.68                                       | 80.65                                                                  | 143.49                                                           | 62.83                                                                   |
| 110         | 166.74                                       | 87.98                                                                  | 158.85                                                           | 70.87                                                                   |
| 120         | 177.41                                       | 94.99                                                                  | 173.82                                                           | 78.83                                                                   |
| 130         | 187.91                                       | 101.74                                                                 | 188.43                                                           | 86.70                                                                   |
| 140         | 198.32                                       | 108.26                                                                 | 202.74                                                           | 94.48                                                                   |
| 150         | 208.71                                       | 114.61                                                                 | 216.78                                                           | 102.16                                                                  |
| 160         | 219.14                                       | 120.82                                                                 | 230.58                                                           | 109.76                                                                  |
| 170         | 229.64                                       | 126.91                                                                 | 244.18                                                           | 117.27                                                                  |
| 180         | 240.29                                       | 132.91                                                                 | 257.61                                                           | 124.69                                                                  |
| 190         | 251.13                                       | 138.85                                                                 | 270.89                                                           | 132.04                                                                  |
| 200         | 262.21                                       | 144.74                                                                 | 284.05                                                           | 139.31                                                                  |
| 210         | 273.60                                       | 150.60                                                                 | 297.12                                                           | 146.51                                                                  |
| 220         | 285.34                                       | 156.46                                                                 | 310.11                                                           | 153.65                                                                  |
| 230         | 297.49                                       | 162.33                                                                 | 323.06                                                           | 160.74                                                                  |
| 240         | 310.11                                       | 168.22                                                                 | 335.99                                                           | 167.77                                                                  |
| 250         | 323.24                                       | 174.16                                                                 | 348.91                                                           | 174.76                                                                  |
| 260         | 336.94                                       | 180.15                                                                 | 361.86                                                           | 181.71                                                                  |
| 270         | 351.27                                       | 186.22                                                                 | 374.84                                                           | 188.62                                                                  |
| 280         | 366.29                                       | 192.38                                                                 | 387.88                                                           | 195.50                                                                  |

|                         |        |        |        |        |
|-------------------------|--------|--------|--------|--------|
| 290                     | 382.19 | 198.65 | 401.01 | 202.36 |
| 298.15                  | 396.00 | 203.85 | 411.79 | 207.94 |
| 300                     | 399.27 | 205.05 | 414.25 | 209.20 |
| 310                     | 417.83 | 211.61 | 427.64 | 216.03 |
| 320                     | 438.17 | 218.37 | 441.22 | 222.86 |
| 330                     | 461.08 | 225.36 | 455.05 | 229.68 |
| 340                     | 489.16 | 232.69 | 469.21 | 236.52 |
| 350                     | 525.44 | 240.52 | 483.89 | 243.38 |
| 360                     | 576.4  | 249.1  | 499.4  | 250.3  |
| 364.3                   | 604.3  | 253.1  | 506.4  | 253.3  |
| Phase transition        |        |        |        |        |
| SmB <sub>Cr</sub> phase |        |        |        |        |
| 364.3                   | 544.32 | 319.8  | 573.0  | 253.3  |
| 370                     | 558.61 | 323.3  | 581.6  | 258.2  |
| 371.8                   | 563.1  | 324.5  | 584.3  | 259.8  |
| Phase transition        |        |        |        |        |
| SmA <sub>d</sub> phase  |        |        |        |        |
| 371.8                   | 664    | 334    | 594    | 259.8  |
| 375.2                   | 663    | 337    | 600    | 263    |
| Phase transition        |        |        |        |        |
| Isotropic liquid        |        |        |        |        |
| 375.2                   | 589.8  | 354    | 617    | 263    |
| 380                     | 588.16 | 357    | 624    | 267    |

---

Table S4. Standard thermodynamic quantities of 5ABCA.

| $\frac{T}{\text{K}}$        | $\frac{C_p}{\text{J K}^{-1} \text{mol}^{-1}}$ | $\frac{[H^\circ(T) - H^\circ(0)] / T}{\text{J K}^{-1} \text{mol}^{-1}}$ | $\frac{S^\circ(T) - S^\circ(0)}{\text{J K}^{-1} \text{mol}^{-1}}$ | $\frac{-[G^\circ(T) - H^\circ(0)] / T}{\text{J K}^{-1} \text{mol}^{-1}}$ |
|-----------------------------|-----------------------------------------------|-------------------------------------------------------------------------|-------------------------------------------------------------------|--------------------------------------------------------------------------|
| Crystal (K <sub>III</sub> ) |                                               |                                                                         |                                                                   |                                                                          |
| 10                          | 7.70                                          | 2.44                                                                    | 3.39                                                              | 0.955                                                                    |
| 20                          | 26.51                                         | 9.48                                                                    | 14.09                                                             | 4.62                                                                     |
| 30                          | 48.74                                         | 18.86                                                                   | 29.05                                                             | 10.19                                                                    |
| 40                          | 69.05                                         | 28.92                                                                   | 45.91                                                             | 16.99                                                                    |
| 50                          | 87.06                                         | 38.79                                                                   | 63.30                                                             | 24.51                                                                    |
| 60                          | 103.14                                        | 48.20                                                                   | 80.62                                                             | 32.42                                                                    |
| 70                          | 117.66                                        | 57.10                                                                   | 97.63                                                             | 40.53                                                                    |
| 80                          | 131.01                                        | 65.51                                                                   | 114.22                                                            | 48.70                                                                    |
| 90                          | 143.54                                        | 73.49                                                                   | 130.38                                                            | 56.89                                                                    |
| 100                         | 155.58                                        | 81.10                                                                   | 146.13                                                            | 65.03                                                                    |
| 110                         | 167.26                                        | 88.41                                                                   | 161.51                                                            | 73.10                                                                    |
| 111.5                       | 168.98                                        | 89.48                                                                   | 163.78                                                            | 74.31                                                                    |
| Phase transition            |                                               |                                                                         |                                                                   |                                                                          |
| Crystal (K <sub>II</sub> )  |                                               |                                                                         |                                                                   |                                                                          |
| 111.5                       | 168.98                                        | 98.18                                                                   | 172.48                                                            | 74.31                                                                    |
| 120                         | 178.63                                        | 103.54                                                                  | 185.25                                                            | 81.71                                                                    |
| 130                         | 189.77                                        | 109.74                                                                  | 199.99                                                            | 90.25                                                                    |
| 140                         | 200.72                                        | 115.85                                                                  | 214.46                                                            | 98.60                                                                    |
| 150                         | 211.57                                        | 121.87                                                                  | 228.67                                                            | 106.80                                                                   |
| 160                         | 222.36                                        | 127.81                                                                  | 242.67                                                            | 114.86                                                                   |
| 170                         | 233.17                                        | 133.69                                                                  | 256.48                                                            | 122.78                                                                   |
| 180                         | 244.07                                        | 139.52                                                                  | 270.11                                                            | 130.59                                                                   |
| 190                         | 255.10                                        | 145.31                                                                  | 283.60                                                            | 138.29                                                                   |
| 200                         | 266.34                                        | 151.08                                                                  | 296.97                                                            | 145.89                                                                   |
| 210                         | 277.86                                        | 156.85                                                                  | 310.25                                                            | 153.40                                                                   |
| 220                         | 289.71                                        | 162.61                                                                  | 323.44                                                            | 160.83                                                                   |
| 230                         | 301.96                                        | 168.41                                                                  | 336.59                                                            | 168.19                                                                   |
| 240                         | 314.68                                        | 174.23                                                                  | 349.71                                                            | 175.48                                                                   |

|                         |        |        |        |        |
|-------------------------|--------|--------|--------|--------|
| 250                     | 327.87 | 180.11 | 362.82 | 182.71 |
| 260                     | 341.18 | 186.05 | 375.94 | 189.89 |
| 270                     | 354.39 | 192.04 | 389.06 | 197.02 |
| 280                     | 367.65 | 198.08 | 402.19 | 204.11 |
| 290                     | 381.14 | 204.16 | 415.33 | 211.17 |
| 298.15                  | 392.43 | 209.15 | 426.05 | 216.90 |
| 300                     | 395.03 | 210.29 | 428.48 | 218.20 |
| 310                     | 409.50 | 216.48 | 441.67 | 225.19 |
| 320                     | 424.74 | 222.75 | 454.91 | 232.16 |
| 330                     | 440.69 | 229.11 | 468.22 | 239.11 |
| 332                     | 444.0  | 230.4  | 470.9  | 240.5  |
| Phase transition        |        |        |        |        |
| SmB <sub>Cr</sub> phase |        |        |        |        |
| 332                     | 510.13 | 289.6  | 530.1  | 240.5  |
| 340                     | 520.61 | 294.9  | 542.4  | 247.5  |
| 350                     | 535.99 | 301.6  | 557.7  | 256.1  |
| 360                     | 556.0  | 308.4  | 573.1  | 264.7  |
| 363.3                   | 563.2  | 310.7  | 578.2  | 267.5  |
| Phase transition        |        |        |        |        |
| SmA <sub>d</sub> phase  |        |        |        |        |
| 363.3                   | 668    | 322    | 590    | 267.5  |
| 365.6                   | 667    | 324    | 594    | 270    |
| Phase transition        |        |        |        |        |
| Isotropic liquid        |        |        |        |        |
| 365.6                   | 580.7  | 339    | 609    | 270    |
| 370                     | 580.86 | 342    | 616    | 274    |
| 380                     | 581.15 | 349    | 631    | 283    |

---

Table S5. Functions of layer spacing ( $c, d$ ) against  $n$   
in  $\text{SmB}_{\text{Cr}}$  and  $\text{SmA}_{\text{d}}$  phases in  $n\text{ABCA}$ ,  $n\text{CBAA}$ , and  $n\text{BBAA}$ .

| Mesogen        | Phase                    | Layer spacing against $n$              |
|----------------|--------------------------|----------------------------------------|
| $n\text{ABCA}$ | $\text{SmB}_{\text{Cr}}$ | $c / \text{\AA} = 1.4 \times n + 13.3$ |
|                | $\text{SmA}_{\text{d}}$  | $d / \text{\AA} = 1.4 \times n + 13.0$ |
| $n\text{CBAA}$ | $\text{SmB}_{\text{Cr}}$ | $c / \text{\AA} = 1.4 \times n + 13.5$ |
|                | $\text{SmA}_{\text{d}}$  | $d / \text{\AA} = 1.4 \times n + 13.2$ |
| $n\text{BBAA}$ | $\text{SmB}_{\text{Cr}}$ | $c / \text{\AA} = 1.4 \times n + 14.4$ |
|                | $\text{SmA}_{\text{d}}$  | $d / \text{\AA} = 1.4 \times n + 13.9$ |



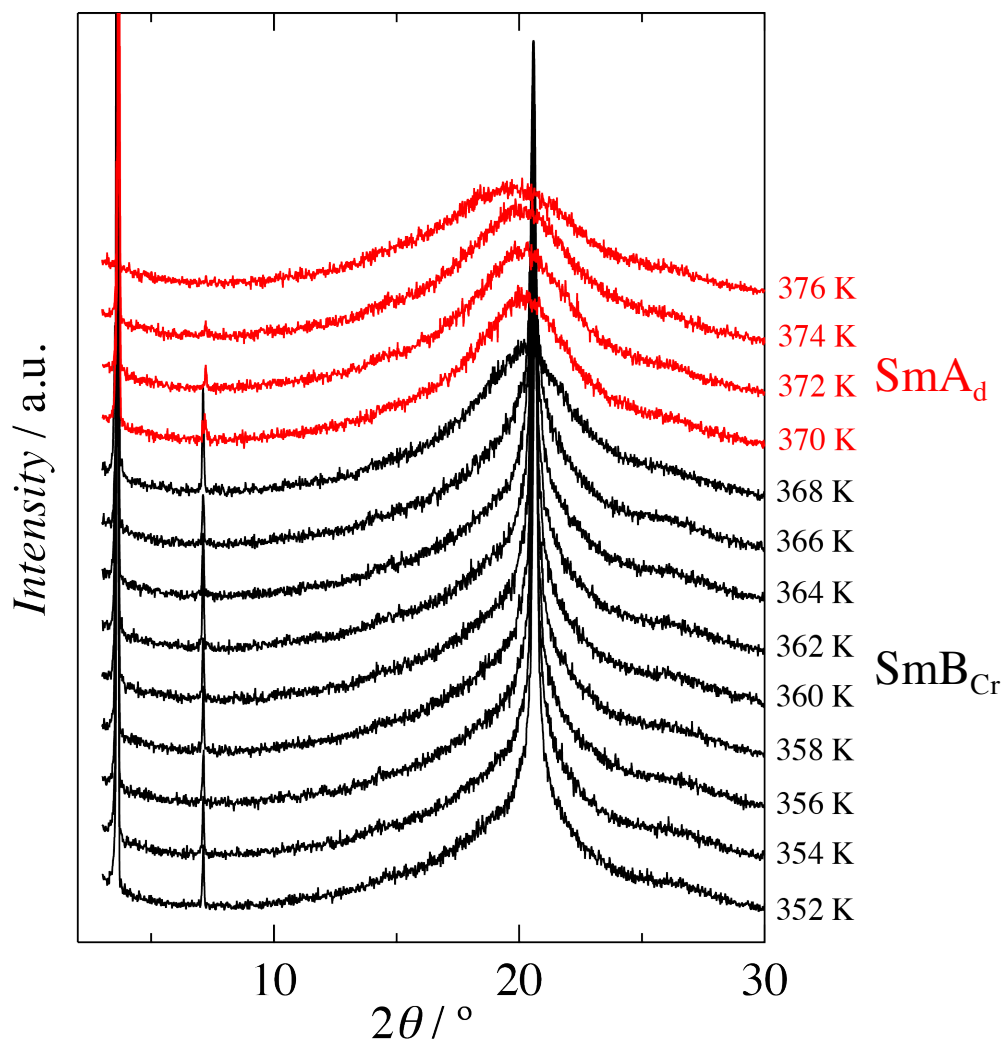

Fig. S1. X-ray diffraction patterns of  $\text{SmA}_d$  and  $\text{SmB}_{Cr}$  phases of 8CBAA at various temperatures (not corrected).
